# Supplementary material for: Solid-state photochromic properties of indole thiosemicarbazones with aggregation-induced emission
Source: Royal Society of Chemistry journal article supplement (doi:10.1039/d3nj05828j), 2024-01-01
Supplement: d3nj05828j1.pdf [file d3nj05828j1.pdf]

## Supporting Information

### Solid-state photochromic properties of indole thiosemicarbazones with aggregation-induced emission

Ying Cao,<sup>a</sup> Yuanyuan Che,<sup>a,b</sup> Lang Liu<sup>a\*</sup> Yakun Tang,<sup>a</sup> Yuming Yu<sup>a</sup>

*a* State Key Laboratory of Chemistry and Utilization of Carbon Based Energy Resources; College of Chemistry, Xinjiang University, Urumqi, 830017,

*Xinjiang, China*

*b* College of Chemistry and Chemical Engineering, Xinjiang Normal University, Xinjiang Key Laboratory of Energy Storage and Photoelectroalytic Materials, Xinjiang Normal University, Urumqi, 830054, China

#### 1. Figure section

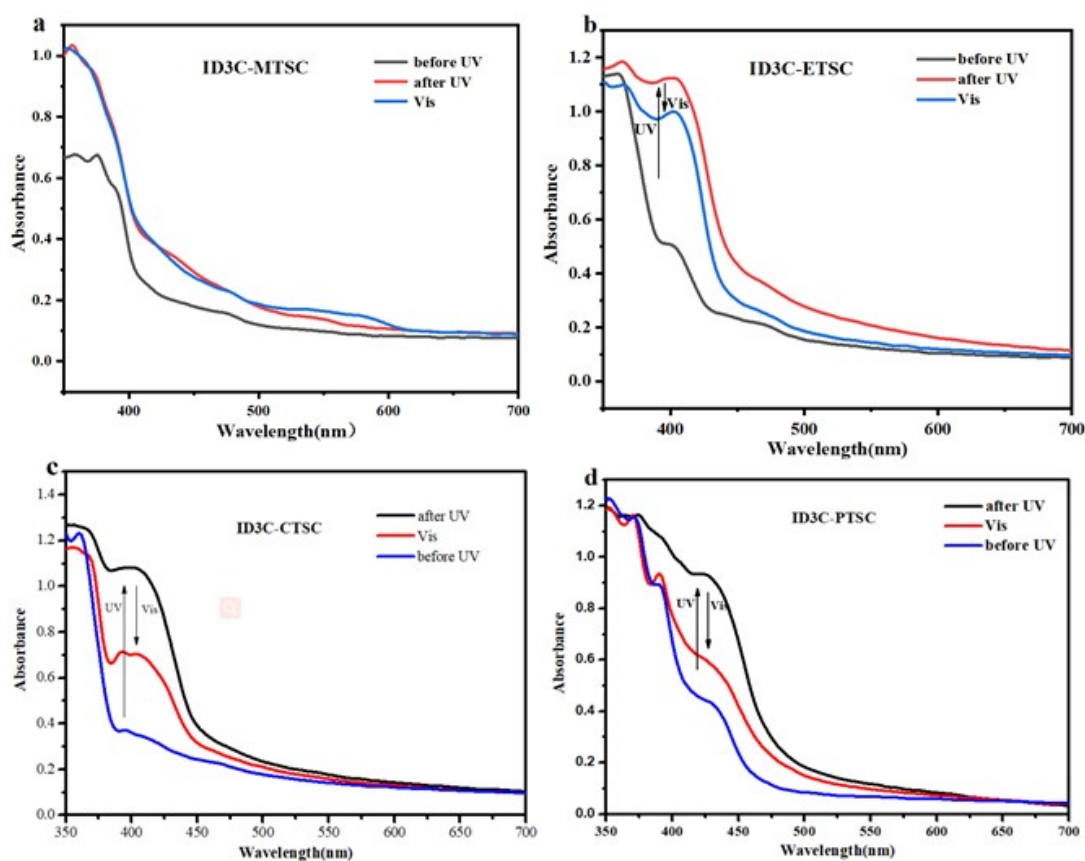

Figure S1 UV-Vis spectra of (a) ID3C-MTSC, (b) ID3C-ETSC, (c) ID3C-CTSC, and (d) ID3C-PTSC before, after 365nm irradiation, and after visible irradiation.

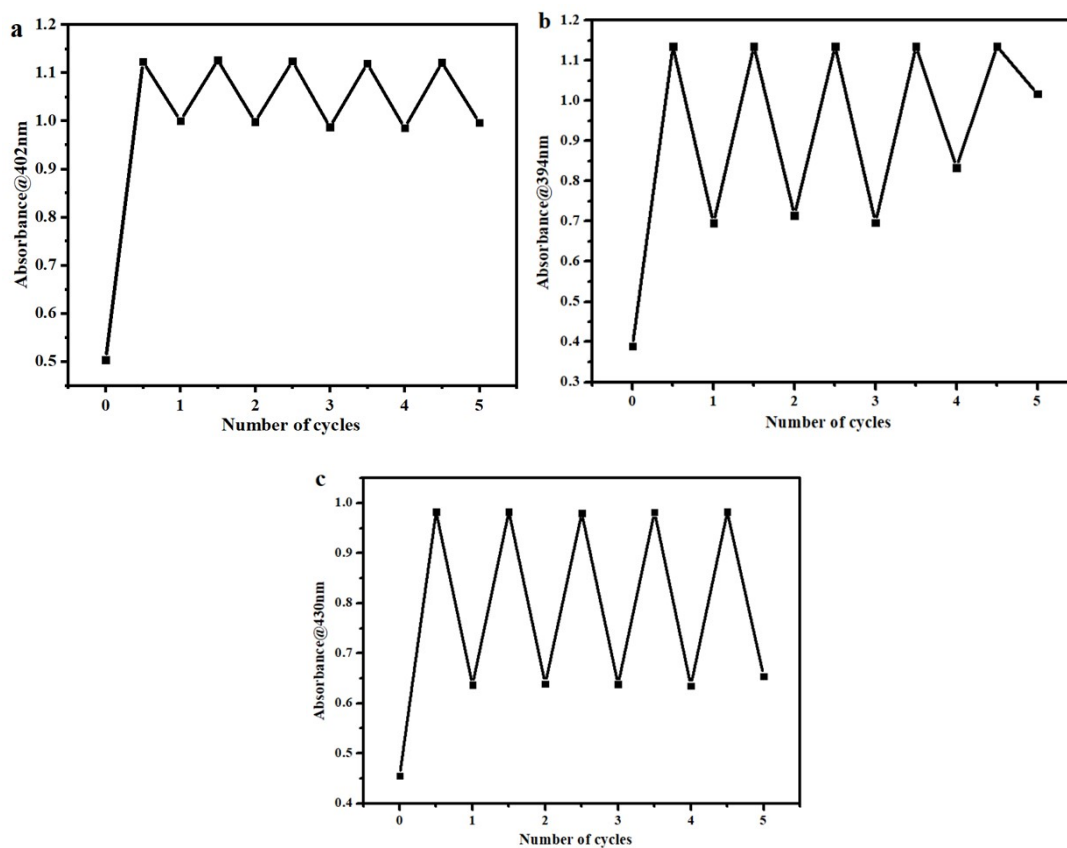

Figure S2 Photochromic cycles of (a) ID3C-ETSC, (b) ID3C-CTSC, and (c) ID3C-PTSC under irradiation of 365 nm light and visible light.

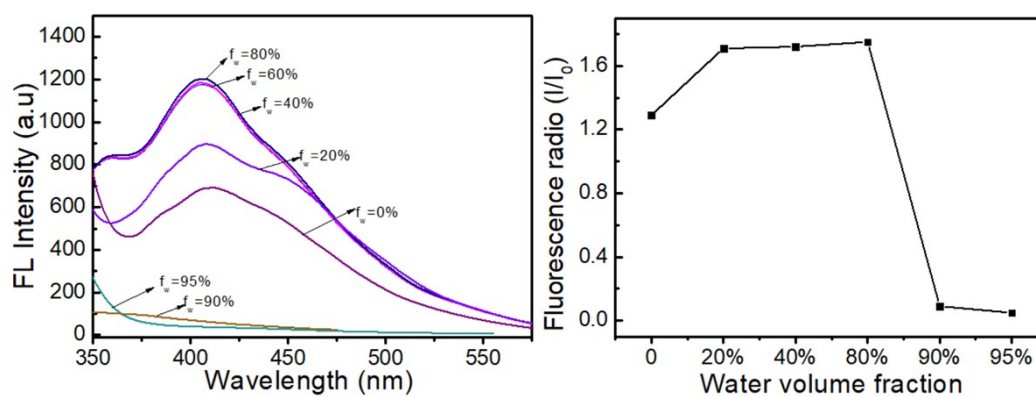

Figure S3 Fluorescence emission (left) and fluorescence ratio ( $I/I_0$ ) (right) of THF with increasing water.

## 2. Table section

Table S1. Torsion angel of ID3C-PTSC in THF and water

|              | In THF         |                | In water       |                |
|--------------|----------------|----------------|----------------|----------------|
|              | S <sub>0</sub> | S <sub>1</sub> | S <sub>0</sub> | S <sub>1</sub> |
| N2-N3-C10-N4 | 0.05053        | -0.01162       | 0.02522        | -0.00141       |
| C9-N2-N3-C10 | 179.94499      | 179.90334      | 179.96169      | 179.98796      |

In order to confirm that the enhanced fluorescence emission of ID3C-PTSC was related to RIR, the first singlet state of ID3C-PTSC in THF and water was optimized with the B3LYP functional and 6-31G (d) basis sets. The torsion angel of N2-N3-C10-N4 and C9-N2-N3-C10 was displayed in Table S1. The torsion angel of N2-N3-C10-N4 and C9-N2-N3-C10 was changed 0.02663 and 0.02627 from ground state (S<sub>0</sub>) to the first singlet state (S<sub>1</sub>) in water, respectively, which were less than in THF (0.06215 for N2-N3-C10-N4, 0.04165 for C9-N2-N3-C10). The result indicate that the water can restrict the intramolecular rotation and further confirmed that the enhanced fluorescence emission of ID3C-PTSC was related to RIR

Table S2. Crystal data and structure refinement for ID3C-ETSC

| Compound              | ID3C-ETSC                                        |
|-----------------------|--------------------------------------------------|
| Empirical formula     | C <sub>12</sub> H <sub>14</sub> N <sub>4</sub> S |
| Formula weight        | 246.33                                           |
| Temperature/K         | 193.0                                            |
| Crystal system        | monoclinic                                       |
| Space group           | P2 <sub>1</sub> /c                               |
| a/Å                   | 15.106(4)                                        |
| b/Å                   | 4.9258(12)                                       |
| c/Å                   | 16.520(4)                                        |
| α/°                   | 90                                               |
| β/°                   | 99.557(12)                                       |
| γ/°                   | 90                                               |
| Volume/Å <sup>3</sup> | 1212.2                                           |
| Z, Calculated density | 4, 1.350g/cm <sup>3</sup>                        |

| <b>Compound</b>                               | <b>ID3C-ETSC</b>                                 |
|-----------------------------------------------|--------------------------------------------------|
| Empirical formula                             | C <sub>12</sub> H <sub>14</sub> N <sub>4</sub> S |
| $\mu$ /mm <sup>-1</sup>                       | 1.461                                            |
| F(000)                                        | 520.0                                            |
| Crystal size/mm <sup>3</sup>                  | 0.12 × 0.1 × 0.1                                 |
| Radiation                                     | Ga K $\alpha$ ( $\lambda$ = 1.34139)             |
| Theta range for data collection/ $^\circ$     | 9.446 to 122.934                                 |
| Index ranges                                  | -18 ≤ h ≤ 19, -6 ≤ k ≤ 5, -21 ≤ l ≤ 17           |
| Reflections collected                         | 10113                                            |
| Independent reflections                       | 2776 [Rint = 0.0547, Rsigma = 0.0470]            |
| Data/restraints/parameters                    | 2776/0/155                                       |
| Goodness-of-fit on F <sup>2</sup>             | 1.134                                            |
| Final R indexes [ $I \geq 2\sigma(I)$ ]       | R1 = 0.0452, wR2 = 0.1216                        |
| Final R indexes [all data]                    | R1 = 0.0600, wR2 = 0.1321                        |
| Largest diff. peak/hole / e $\text{\AA}^{-3}$ | 0.27/-0.39                                       |

Table S3. Bond lengths for ID3C-ETSC

| <b>Bonds</b> | <b>Length/<math>\text{\AA}</math></b> | <b>Bonds</b> | <b>Length/<math>\text{\AA}</math></b> |
|--------------|---------------------------------------|--------------|---------------------------------------|
| S1-C10       | 1.6896(19)                            | C1-C6        | 1.407(3)                              |
| N1-C1        | 1.379(3)                              | C2-C3        | 1.377(4)                              |
| N1-C8        | 1.353(3)                              | C3-C4        | 1.392(4)                              |
| N2-N3        | 1.377(2)                              | C4-C5        | 1.375(3)                              |
| N2-C9        | 1.287(2)                              | C5-C6        | 1.397(3)                              |
| N3-C10       | 1.343(2)                              | C6-C7        | 1.441(3)                              |
| N4-C10       | 1.330(2)                              | C7-C8        | 1.376(3)                              |
| N4-C11       | 1.447(2)                              | C7-C9        | 1.428(3)                              |
| C1-C2        | 1.390(3)                              | C11-C12      | 1.503(3)                              |

Table S4. Bond angles for ID3C-ETSC

| <b>Bonds</b> | <b>Angle(<math>^\circ</math>)</b> | <b>Bonds</b> | <b>Angle(<math>^\circ</math>)</b> |
|--------------|-----------------------------------|--------------|-----------------------------------|
| C8-N1-C1     | 109.15(16)                        | C5-C6-C1     | 118.75(19)                        |

|           |            |            |             |
|-----------|------------|------------|-------------|
| C9-N2-N3  | 116.01(16) | C5-C6-C7   | 134.93(18)  |
| C10-N3-N2 | 119.39(15) | C8-C7-C6   | 106.43(18)  |
| N1-C1-C2  | 129.6(2)   | C8-C7-C9   | 124.58(19)  |
| N1-C1-C6  | 107.93(18) | C9-C7-C6   | 128.92(17)  |
| C2-C1-C6  | 122.4(2)   | N1-C8-C7   | 110.17(19)  |
| C3-C2-C1  | 117.5(3)   | N2-C9-C7   | 121.26(318) |
| C2-C3-C4  | 121.9(2)   | N3-C10-S1  | 120.58(14)  |
| C5-C4-C3  | 120.9(2)   | N4-C10-S1  | 123.06(14)  |
| C4-C5-C6  | 119.1(2)   | N4-C10-N3  | 116.34(16)  |
| C1-C6-C7  | 106.32(18) | N4-C11-C12 | 110.04(19)  |

Table S5. Hydrogen Bonds for ID3C-ETSC

| <b>D-H...A</b> | <b>d(H...A)</b> | <b>d(D-H)</b> | <b>d(D...A)</b> | <b>∠(DHA)</b> |
|----------------|-----------------|---------------|-----------------|---------------|
| N1-H1...S1     | 0.88            | 2.5693(4)     | 3.4442(19)      | 172.851(16)   |
| N3-H3...S1     | 0.88            | 2.6726(6)     | 3.3810(17)      | 138.474(14)   |

Table S6 HOMOs and LUMOs of the four compounds calculated with B3LYP/6-311+G(d) level

| compound  | Electronic transition          | Energy (eV)     | Oscillator strengths | Composition | Transition type | Egap |
|-----------|--------------------------------|-----------------|----------------------|-------------|-----------------|------|
| ID3C-MTSC | S <sub>0</sub> →S <sub>2</sub> | 3.82eV/324.53nm | 0.4291               | H→L         | π→π*            | 4.18 |
| ID3C-ETSC | S <sub>0</sub> →S <sub>2</sub> | 3.83eV/323.03nm | 0.4654               | H-1→L       | π→π*            | 4.17 |
| ID3C-CTSC | S <sub>0</sub> →S <sub>2</sub> | 3.81eV/325.43nm | 0.4436               | H-1→L       | π→π*            | 4.16 |
| ID3C-PTSC | S <sub>0</sub> →S <sub>2</sub> | 3.70eV/334.46nm | 0.8249               | H→L         | π→π*            | 4.02 |
